# Supplementary material for: Crystal Structure of the SH3 Domain of ASAP1 in Complex with the Proline Rich Motif (PRM) of MICAL1 Reveals a Unique SH3/PRM Interaction Mode
Source: MDPI journal article supplement (doi:10.3390/ijms24021414), 2023-01-11
Supplement: s1 [file s1]

## Supplementary Figures and Tables:

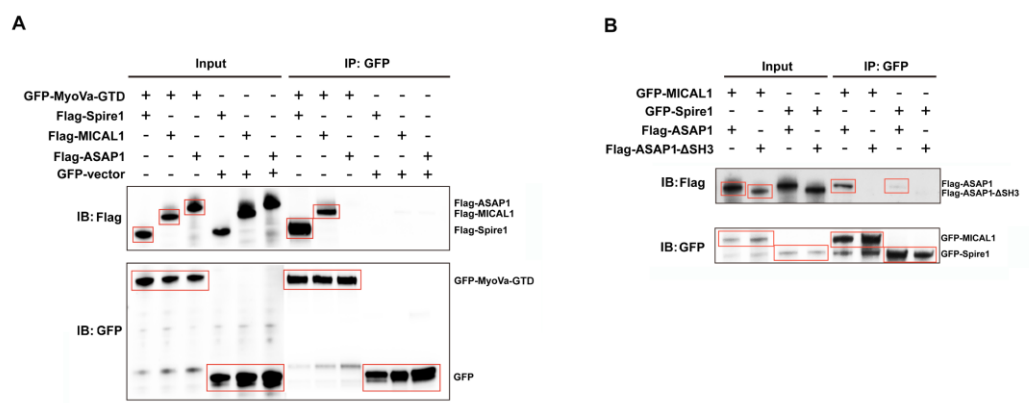

**Figure S1.** MICAL1 interacts with ASAP1. **(A)** Co-IP result showing that ASAP1 cannot associate with MyoVa-GTD in 293T cells, differing from MICAL1 and Spire1. **(B)** Co-IP result showing that MICAL1, stronger than Spire1, interacts with ASAP1.

| SH3 domain-containing protein | PRM -containing protein | Binding affinity ( $\mu\text{M}$ ) | PRM Sequence<br>$\text{Px}\Phi\text{Px}(\text{K/R})$ | Measurement Method               | Reference |
|-------------------------------|-------------------------|------------------------------------|------------------------------------------------------|----------------------------------|-----------|
| Grb2                          | C3G                     | 142                                | PPPALPPKRR                                           | Fluorescence spectroscopy        | Ref-18    |
| v-Crk                         | Sos                     | 23.7                               | PPPVPPRRRR                                           | Fluorescence spectroscopy        | Ref-18    |
| Src                           | PLR1                    | 59                                 | AFAPPLPRR                                            | Fluorescence spectroscopy        | Ref-7     |
| Hck                           | Nef                     | 91                                 | VRPQVPLRPM                                           | Surface plasmon resonance        | Ref-12    |
| SEM-5                         | Sos                     | 43                                 | PPPVPPRRRR                                           | Fluorescence spectroscopy        | Ref-8     |
| Fyn                           | Nef                     | 202                                | VRPQVPLRPM                                           | Fluorescence spectroscopy        | Ref-12    |
| Cortactin                     | HPK1                    | 64                                 | KPPLLPPKKE                                           | Isothermal titration calorimetry | Ref-17    |
| PLCy1                         | SLP-76                  | 33                                 | TPPVPPQRPM                                           | Isothermal titration calorimetry | Ref-13    |

**Figure S2.** List of some typical class-II PRMs targeted by the SH3-containing proteins with relatively low binding affinities. The reported sequence of the class-II PRMs and their binding affinities to the SH3 domains as well as the affinity detection method are summarized.

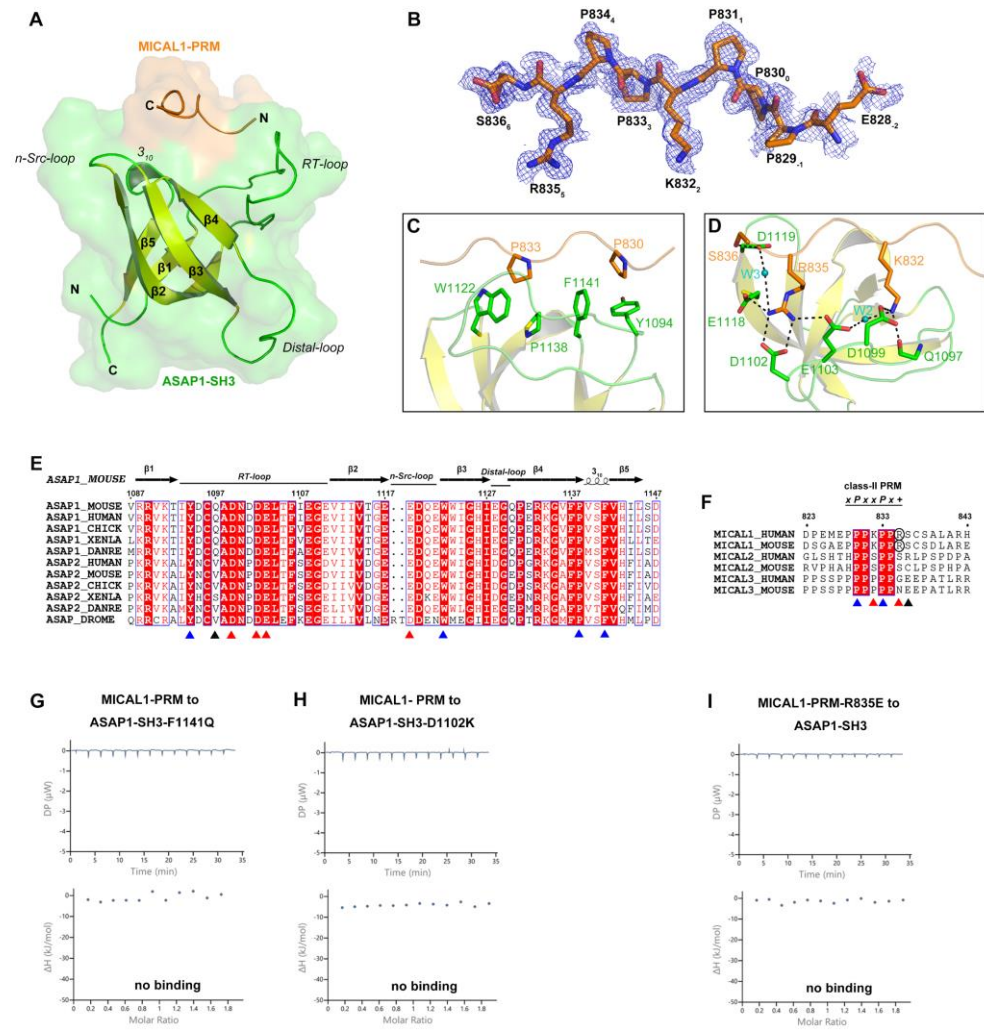

**Figure S3.** Overall structure of ASAP1-SH3 and MICAL1-PRM complex. **(A)** Crystal structure of ASAP1-SH3 and MICAL1-PRM complex in cartoon mode covered with a transparent surface. The conserved five  $\beta$ -sheets, three loops and a short helix in ASAP1-SH3 are labeled. **(B)** The  $F_o - F_c$  map of MICAL1-PRM with its atomic model in stick mode. **(C** and **D)** The detailed contacts of ASAP1-SH3 and MICAL1-PRM, including the hydrophobic (**C**) and charge-to-charge (**D**) interactions. **(E** and **F)** Sequence alignments of the SH3 domains in ASAP family proteins (**E**) and the proline-rich regions in MICAL family proteins (**F**). The residues involving hydrophobic, charge-to-charge and hydrogen bonding interactions observed in ASAP1-SH3/MICAL1-PRM structure are labeled by blue, red, and black triangles, respectively. The sequence pattern of class-II PRM is also indicated in **F**. **(G** to **I)** ITC-based affinity measurements of either mutated ASAP1-SH3 (**G**, **H**) or mutated MICAL1-PRM (**I**) binding to the wild-type proteins as indicated.

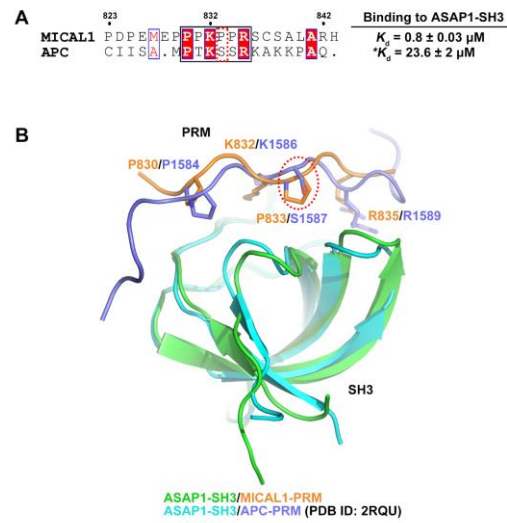

**Figure S4.** Sequence and structure comparisons of ASAP-SH3 binding to MICAL1-PRM or APC-PRM. (A) Sequence alignment showing the difference PRMs with different affinity binding to ASAP1-SH3. “The reported affinity in another studies. (B) Structural superimposing by aligning their SH3 domain structures. The different residues in MICAL1-PRM and APC-PRM are circled by a red dash line.

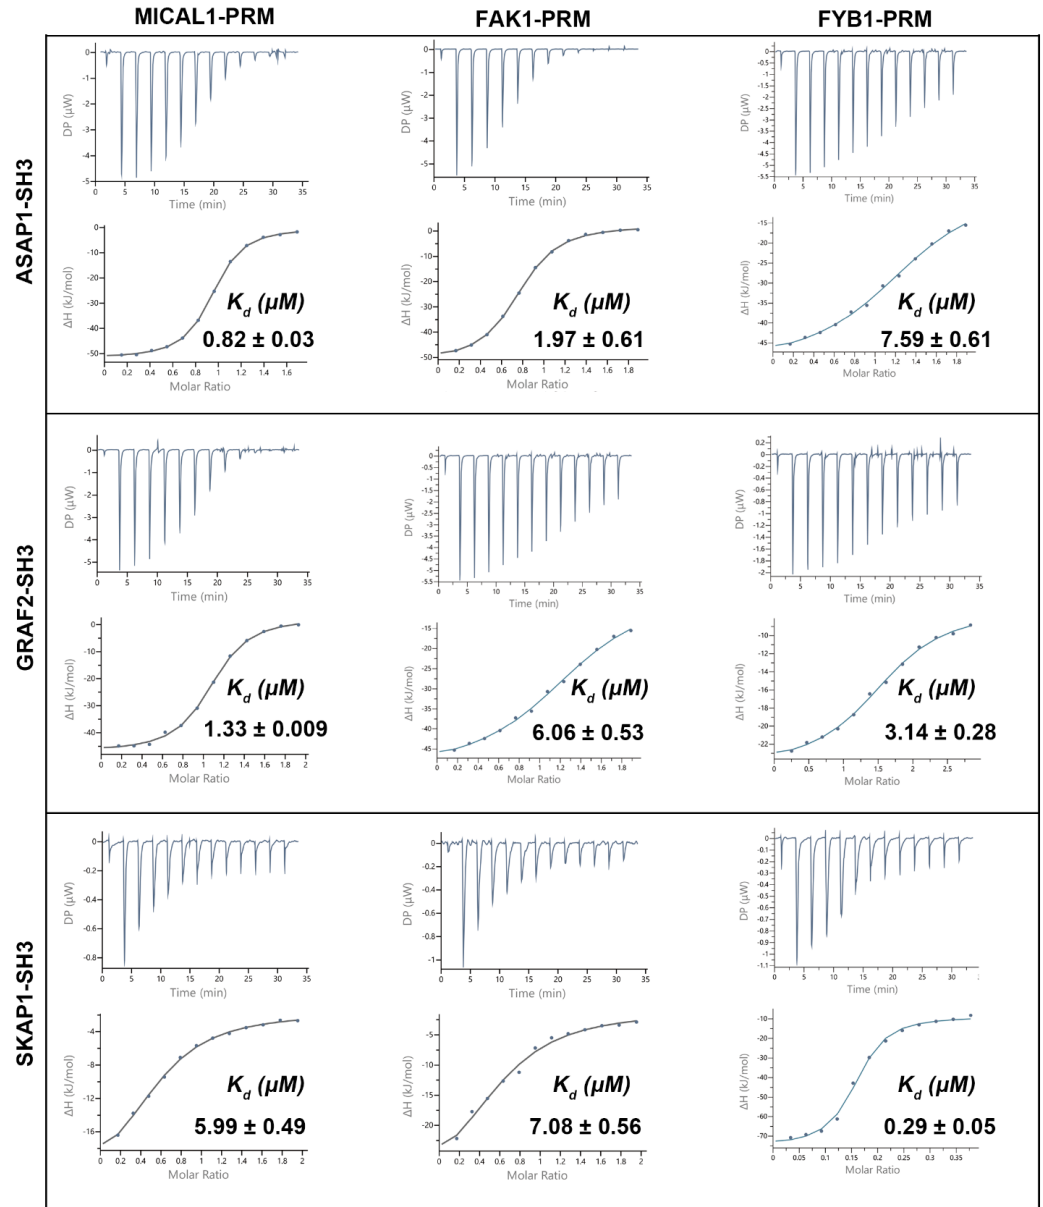

**Figure S5.** ITC curves showing the interactions between the SH3 domains of ASAP1/GRAF2/SKAP1 and the PRMs of MICAL1/FAK1/FYB1, summarized in Figure3C.

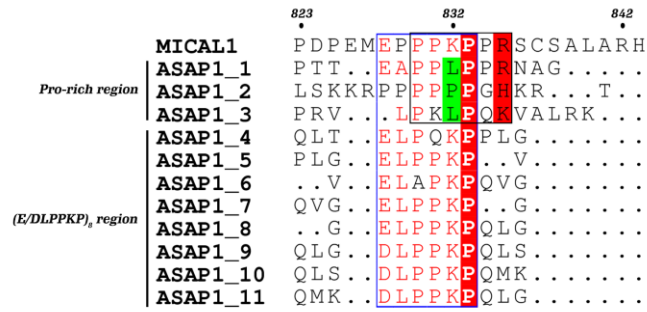

**Figure S6.** Sequence alignment of the proline-rich region and 8\*(E/D)LPPKP region in ASAP1 with MICAL1-PRM. Three typical class-II PRMs can be found in proline-rich region, which contain a hydrophobic residue (green) in the position corresponding K832 of MICAL1-PRM. All eight (E/D)LPPKP motifs is lack of the positively charged residue in the position corresponding R835 in MICAL1-PRM.

**Table S1.** Data collection and refinement statistics.

| <b>Data collection</b>                                                                                                                                                                                                                                                                                                                                                                                                                                                                                                                                                                                                                                                                                                                                                                                                                    |                            |
|-------------------------------------------------------------------------------------------------------------------------------------------------------------------------------------------------------------------------------------------------------------------------------------------------------------------------------------------------------------------------------------------------------------------------------------------------------------------------------------------------------------------------------------------------------------------------------------------------------------------------------------------------------------------------------------------------------------------------------------------------------------------------------------------------------------------------------------------|----------------------------|
| X-ray source                                                                                                                                                                                                                                                                                                                                                                                                                                                                                                                                                                                                                                                                                                                                                                                                                              | SSRF-19U1                  |
| Space group                                                                                                                                                                                                                                                                                                                                                                                                                                                                                                                                                                                                                                                                                                                                                                                                                               | <i>P</i> 6 <sub>2</sub>    |
| Cell dimensions                                                                                                                                                                                                                                                                                                                                                                                                                                                                                                                                                                                                                                                                                                                                                                                                                           |                            |
| a, b, c (Å)                                                                                                                                                                                                                                                                                                                                                                                                                                                                                                                                                                                                                                                                                                                                                                                                                               | 45.18, 45.18, 59.39        |
| α, β, γ (°)                                                                                                                                                                                                                                                                                                                                                                                                                                                                                                                                                                                                                                                                                                                                                                                                                               | 90.00, 90.00, 120.00       |
| Resolution range (Å)                                                                                                                                                                                                                                                                                                                                                                                                                                                                                                                                                                                                                                                                                                                                                                                                                      | 39.13 – 1.17 (1.21 – 1.17) |
| R <sub>merge</sub> (%) <sup>a</sup>                                                                                                                                                                                                                                                                                                                                                                                                                                                                                                                                                                                                                                                                                                                                                                                                       | 4.1 (19.16)                |
| CC <sub>1/2</sub> <sup>b</sup>                                                                                                                                                                                                                                                                                                                                                                                                                                                                                                                                                                                                                                                                                                                                                                                                            | 0.99 (0.90)                |
| I/σ(I)                                                                                                                                                                                                                                                                                                                                                                                                                                                                                                                                                                                                                                                                                                                                                                                                                                    | 11.32 (2.50)               |
| Completeness (%)                                                                                                                                                                                                                                                                                                                                                                                                                                                                                                                                                                                                                                                                                                                                                                                                                          | 91.7 (48.54)               |
| Redundancy                                                                                                                                                                                                                                                                                                                                                                                                                                                                                                                                                                                                                                                                                                                                                                                                                                | 4.9 (4.6)                  |
| <b>Refinement</b>                                                                                                                                                                                                                                                                                                                                                                                                                                                                                                                                                                                                                                                                                                                                                                                                                         |                            |
| Resolution (Å)                                                                                                                                                                                                                                                                                                                                                                                                                                                                                                                                                                                                                                                                                                                                                                                                                            | 39.13 – 1.17 (1.21 – 1.17) |
| No. Reflections                                                                                                                                                                                                                                                                                                                                                                                                                                                                                                                                                                                                                                                                                                                                                                                                                           | 21440 (1130)               |
| R <sub>work</sub> /R <sub>free</sub> (%) <sup>c</sup>                                                                                                                                                                                                                                                                                                                                                                                                                                                                                                                                                                                                                                                                                                                                                                                     | 11.3 (15.6) / 14.2 (20.7)  |
| No. atoms                                                                                                                                                                                                                                                                                                                                                                                                                                                                                                                                                                                                                                                                                                                                                                                                                                 |                            |
| Protein                                                                                                                                                                                                                                                                                                                                                                                                                                                                                                                                                                                                                                                                                                                                                                                                                                   | 657                        |
| Ligand                                                                                                                                                                                                                                                                                                                                                                                                                                                                                                                                                                                                                                                                                                                                                                                                                                    | 5                          |
| Water                                                                                                                                                                                                                                                                                                                                                                                                                                                                                                                                                                                                                                                                                                                                                                                                                                     | 114                        |
| Mean B (Å <sup>2</sup> )                                                                                                                                                                                                                                                                                                                                                                                                                                                                                                                                                                                                                                                                                                                                                                                                                  | 20.5                       |
| R.m.s deviations                                                                                                                                                                                                                                                                                                                                                                                                                                                                                                                                                                                                                                                                                                                                                                                                                          |                            |
| Bond lengths (Å)                                                                                                                                                                                                                                                                                                                                                                                                                                                                                                                                                                                                                                                                                                                                                                                                                          | 0.008                      |
| Bond angles (°)                                                                                                                                                                                                                                                                                                                                                                                                                                                                                                                                                                                                                                                                                                                                                                                                                           | 1.31                       |
| Ramachandran analysis                                                                                                                                                                                                                                                                                                                                                                                                                                                                                                                                                                                                                                                                                                                                                                                                                     |                            |
| Favored region (%)                                                                                                                                                                                                                                                                                                                                                                                                                                                                                                                                                                                                                                                                                                                                                                                                                        | 98.7                       |
| Allowed region (%)                                                                                                                                                                                                                                                                                                                                                                                                                                                                                                                                                                                                                                                                                                                                                                                                                        | 1.3                        |
| Outliers (%)                                                                                                                                                                                                                                                                                                                                                                                                                                                                                                                                                                                                                                                                                                                                                                                                                              | 0                          |
| <p>The numbers in parentheses represent values for the highest resolution shell.</p> <p><sup>a</sup>R<sub>merge</sub> = <math>\sum  I_i - I_m  / \sum I_i</math>, where <math>I_i</math> is the intensity of the measured reflection and <math>I_m</math> is the mean intensity of all symmetry related reflections.</p> <p><sup>b</sup>CC<sub>1/2</sub> is the correlation coefficient of the half datasets.</p> <p><sup>c</sup>R<sub>work</sub> = <math>\sum   F_{obs}  -  F_{calc}   / \sum  F_{obs} </math>, where <math>F_{obs}</math> and <math>F_{calc}</math> are observed and calculated structure factors.</p> <p>R<sub>free</sub> = <math>\sum_T   F_{obs}  -  F_{calc}   / \sum_T  F_{obs} </math>, where T is a test data set of about 1.7 % of the total reflections randomly chosen and set aside prior to refinement.</p> |                            |

**Table S2.** List of the PRM<sup>Px+P</sup>-containing proteins for GO analysis.

| Gene Name | Protein Name | Uniprot ID | GO analysis-suggested term ID and functional field                                                                                                                                                                                                                        | PRM Position | PRM Sequence   |
|-----------|--------------|------------|---------------------------------------------------------------------------------------------------------------------------------------------------------------------------------------------------------------------------------------------------------------------------|--------------|----------------|
| ABCF1     | ABCF1        | Q8NE71     |                                                                                                                                                                                                                                                                           | 112-125      | ALLLPMKPLKATAT |
| ANS1A     | ANS1A        | Q92625     |                                                                                                                                                                                                                                                                           | 834-847      | YEEPPQKPPRFSQL |
| ANS1B     | ANS1B        | Q7Z6G8     |                                                                                                                                                                                                                                                                           | 948-961      | HDDPPQKPPRSITL |
| ARAP3     | ARAP3        | Q8WWN8     | GO:0022604 (regulation of cell morphogenesis);<br>GO:1902532 (negative regulation of intracellular signal transduction)                                                                                                                                                   | 388-401      | RPPQPPRPLRTGML |
| ARHGEF5   | ARHG5        | Q12774     | GO:0051493 (regulation of cytoskeleton organization)                                                                                                                                                                                                                      | 628-641      | HSELPQRPPKPAIY |
| ARHGEF12  | ARHGC        | Q9NZN5     | GO:0045859 (regulation of protein kinase activity)                                                                                                                                                                                                                        | 600-613      | ILGPPRRPSRHDNS |
| ASPCR1    | ASPC1        | Q9BZE9     |                                                                                                                                                                                                                                                                           | 275-388      | SPGGPSKPKKSKSG |
| ATP2A2    | AT2A2        | P16615     | GO:0060627 (regulation of vesicle-mediated transport);<br>GO:0051640 (organelle localization)                                                                                                                                                                             | 496-509      | VYCTPNKPSRTSMS |
| SLC4A3    | B3A3         | P48751     |                                                                                                                                                                                                                                                                           | 55-68        | PAWDPEKPSRSYSE |
| BCAR3     | BCAR3        | O75815     | GO:1901699 (cellular response to nitrogen compound)                                                                                                                                                                                                                       | 400-413      | CPKPPPKPCKVPFL |
| BMPR2     | BMPR2        | Q13873     | GO:0045859 (regulation of protein kinase activity);<br>GO:0120035 (regulation of plasma membrane bounded cell projection organization);<br>GO:0008285 (negative regulation of cell population proliferation);<br>GO:0071363 (cellular response to growth factor stimulus) | 925-938      | ADPGPSKPRRAQRP |
| CDC42EP2  | BORG1        | O14613     | GO:0051493 (regulation of cytoskeleton organization);<br>GO:0120035 (regulation of plasma membrane bounded cell projection organization);                                                                                                                                 | 123-136      | TAQAPPKPPRLHLE |



|         |       |        |                                                                                                                                                                                                                                                                                               |           |                |
|---------|-------|--------|-----------------------------------------------------------------------------------------------------------------------------------------------------------------------------------------------------------------------------------------------------------------------------------------------|-----------|----------------|
|         |       |        | GO:0022604 (regulation of cell morphogenesis);<br>GO:0120034 (positive regulation of plasma membrane bounded cell projection assembly)                                                                                                                                                        |           |                |
| BRPF1   | BRPF1 | P55201 |                                                                                                                                                                                                                                                                                               | 901-914   | TAGPPKRPGRPPKN |
| BTG2    | BTG2  | P78543 | GO:0009896 (positive regulation of catabolic process);<br>GO:0008285 (negative regulation of cell population proliferation);<br>GO:0031175 (neuron projection development)                                                                                                                    | 52-65     | HHWFPEKPSKSGSY |
| BTG1    | BTG1  | P62324 | GO:0008285 (negative regulation of cell population proliferation)                                                                                                                                                                                                                             | 54-67     | HHWFPEKPCKSGSY |
| RLTPR   | CARL2 | Q6F5E8 | GO:0120035 (regulation of plasma membrane bounded cell projection organization);<br>GO:0120034 (positive regulation of plasma membrane bounded cell projection assembly)                                                                                                                      | 1135-1148 | LLRPPTRPSRGEEL |
| LRRC16B | CARL3 | Q8ND23 |                                                                                                                                                                                                                                                                                               | 1334-1347 | RRTAPLKPKRTRRA |
| PRKCDBP | CAVN3 | Q969G5 | GO:1902532 (negative regulation of intracellular signal transduction)                                                                                                                                                                                                                         | 202-215   | PPPTPVKPPRLGPG |
| CBLB    | CBLB  | Q13191 | GO:0009896 (positive regulation of catabolic process);<br>GO:0045859 (regulation of protein kinase activity);<br>GO:0050852 (T cell receptor signaling pathway);<br>GO:0008285 (negative regulation of cell population proliferation);<br>GO:0042326 (negative regulation of phosphorylation) | 898-911   | GSQAPARPPKPRPR |
| CD2AP   | CD2AP | Q9Y5K6 | GO:0051493 (regulation of cytoskeleton organization);<br>GO:0009896 (positive regulation of catabolic process);<br>GO:1902532 (negative regulation of intracellular signal transduction)                                                                                                      | 406-419   | GTVYPKRPEKPVPP |

|         |       |        |                                                                                                                                                                                                                                           |           |                |
|---------|-------|--------|-------------------------------------------------------------------------------------------------------------------------------------------------------------------------------------------------------------------------------------------|-----------|----------------|
| CDKN1B  | CDN1B | P46527 | GO:0051493 (regulation of cytoskeleton organization);<br>GO:0045859 (regulation of protein kinase activity);<br>GO:0008285 (negative regulation of cell population proliferation);<br>GO:0042326 (negative regulation of phosphorylation) | 87-100    | FYYRPPRPPKGACK |
| CHD4    | CHD4  | Q14839 | GO:0050808 (synapse organization)                                                                                                                                                                                                         | 1380-1393 | RSEAPRRPSRKGLR |
| CHMP4B  | CHM4B | Q9H444 | GO:0051668 (localization within membrane);<br>GO:0051668 (localization within membrane);<br>GO:0051640 (organelle localization)                                                                                                           | 196-209   | SIALPSKPAKKKEE |
| CLUAP1  | CLUA1 | Q96AJ1 |                                                                                                                                                                                                                                           | 389-402   | ISLSPTKPNRRVRK |
| CASKIN1 | CSKI1 | Q8WXD9 |                                                                                                                                                                                                                                           | 869-882   | ADAEPGRPKKRAHS |
| CASKIN2 | CSKI2 | Q8WXE0 |                                                                                                                                                                                                                                           | 787-800   | TPPDPPRPKRRSHS |
| DENND1C | DEN1C | Q8IV53 | GO:0051668 (localization within membrane)                                                                                                                                                                                                 | 504-517   | GKNRPLRPSRRRQL |
| DENND4B | DEN4B | O75064 | GO:0006897 (endocytosis)                                                                                                                                                                                                                  | 510-523   | PRTLPRRPYKVLLA |
| DLGAP1  | DLGP1 | O14490 | GO:0098962 (regulation of postsynaptic neurotransmitter receptor activity);<br>GO:1902532 (negative regulation of intracellular signal transduction)                                                                                      | 913-926   | PPPVPKKPAKGPAP |
| DLGAP2  | DLGP2 | Q9P1A6 |                                                                                                                                                                                                                                           | 988-1001  | PPPIPKKPPKGKFP |
| DLGAP3  | DLGP3 | O95886 | GO:0098962 (regulation of postsynaptic neurotransmitter receptor activity);<br>GO:0050808 (synapse organization)                                                                                                                          | 913-926   | PPPIPKKPLRGRGV |
| DLGAP4  | DLGP4 | Q9Y2H0 | GO:0098962 (regulation of postsynaptic neurotransmitter receptor activity)                                                                                                                                                                | 926-939   | PPPVPKKPAKSKPA |
| DLG5    | DLG5  | Q8TDM6 | GO:0008285 (negative regulation of cell population proliferation)                                                                                                                                                                         | 1008-1021 | GPLTPPKPPRRSDS |

|       |       |        |                                                                                                                                                                                                                                                                                                                                                                           |           |                |
|-------|-------|--------|---------------------------------------------------------------------------------------------------------------------------------------------------------------------------------------------------------------------------------------------------------------------------------------------------------------------------------------------------------------------------|-----------|----------------|
| DOC2A | DOC2A | Q14183 | GO:0060627 (regulation of vesicle-mediated transport);<br>GO:0006897 (endocytosis)                                                                                                                                                                                                                                                                                        | 21-34     | VCPGPIRPIRQISD |
| DOC2B | DOC2B | Q14184 |                                                                                                                                                                                                                                                                                                                                                                           | 22-35     | VCPGPIRPIKQISD |
| DOCK1 | DOCK1 | Q14185 | GO:0022604 (regulation of cell morphogenesis)                                                                                                                                                                                                                                                                                                                             | 1731-1744 | ETISPLRPQRPKSQ |
| DOK7  | DOK7  | Q18PE1 | GO:0045859 (regulation of protein kinase activity);<br>GO:0050808 (synapse organization)                                                                                                                                                                                                                                                                                  | 314-327   | ASRPPPKPLRPRQL |
| DRD2  | DRD2  | P14416 | GO:0045859 (regulation of protein kinase activity); GO:0006897 (endocytosis);<br>GO:1901699 (cellular response to nitrogen compound);<br>GO:0050808 (synapse organization);<br>GO:0008285 (negative regulation of cell population proliferation);<br>GO:1902532 (negative regulation of intracellular signal transduction);<br>GO:0031175 (neuron projection development) | 319-332   | TPDSPAKPEKNGHA |
| DNAH1 | DYH1  | Q9P2D7 |                                                                                                                                                                                                                                                                                                                                                                           | 646-659   | LINSPIRPRKNPLF |
| DNAH5 | DYH5  | Q8TE73 |                                                                                                                                                                                                                                                                                                                                                                           | 3927-3940 | LKACPPKPSKWILD |
| DNM1  | DYN1  | Q05193 | GO:0006897 (endocytosis);<br>GO:1901699 (cellular response to nitrogen compound);<br>GO:0051668 (localization within membrane);<br>GO:0051640 (organelle localization)                                                                                                                                                                                                    | 829-842   | PPQVPSRPNRAPPG |
| DNM2  | DYN2  | P50570 | GO:0060627 (regulation of vesicle-mediated transport);<br>GO:0120035 (regulation of plasma membrane bounded cell projection organization);<br>GO:0006897 (endocytosis);<br>GO:0022604 (regulation of cell morphogenesis);<br>GO:0051640 (organelle localization);                                                                                                         | 828-841   | FGAPPQVPSRPTRA |

|       |      |        |                                                                                                                                                                                                                                                                                                                                  |         |                |
|-------|------|--------|----------------------------------------------------------------------------------------------------------------------------------------------------------------------------------------------------------------------------------------------------------------------------------------------------------------------------------|---------|----------------|
|       |      |        | GO:0120034 (positive regulation of plasma membrane bounded cell projection assembly);<br>GO:0031175 (neuron projection development)                                                                                                                                                                                              |         |                |
| DNM23 | DYN3 | Q9UQ16 | GO:0120035 (regulation of plasma membrane bounded cell projection organization);<br>GO:0006897 (endocytosis);<br>GO:0050808 (synapse organization);<br>GO:0120034 (positive regulation of plasma membrane bounded cell projection assembly)                                                                                      | 831-844 | PPQVPSRPTRAPPS |
| EGR1  | EGR1 | P18146 | GO:0045859 (regulation of protein kinase activity);<br>GO:1901699 (cellular response to nitrogen compound);<br>GO:0071363 (cellular response to growth factor stimulus)                                                                                                                                                          | 321-334 | MRKYPNRPSKTPPH |
| EHD1  | EHD1 | Q9H4M9 | GO:0060627 (regulation of vesicle-mediated transport);<br>GO:0120035 (regulation of plasma membrane bounded cell projection organization);<br>GO:0006897 (endocytosis);<br>GO:0051668 (localization within membrane);<br>GO:0031175 (neuron projection development);<br>GO:0071363 (cellular response to growth factor stimulus) | 114-127 | LVVDPRRPFRKLNA |
| EHD2  | EHD2 | Q9NZN4 | GO:0060627 (regulation of vesicle-mediated transport);<br>GO:0006897 (endocytosis);<br>GO:0051668 (localization within membrane)                                                                                                                                                                                                 | 114-127 | LVVDPKPFRKLNP  |
| EHD3  | EHD3 | Q9NZN3 | GO:0006897 (endocytosis);<br>GO:0051668 (localization within membrane)                                                                                                                                                                                                                                                           | 114-127 | LVVDPKKPFRKLNA |
| EHD4  | EHD4 | Q9H223 | GO:0060627 (regulation of vesicle-mediated transport);                                                                                                                                                                                                                                                                           | 117-130 | LVVDPKKPFRKLSR |

|        |       |        |                                                                                                                                                                                                                                                                                                                                                                                                                                                                                                             |         |                |
|--------|-------|--------|-------------------------------------------------------------------------------------------------------------------------------------------------------------------------------------------------------------------------------------------------------------------------------------------------------------------------------------------------------------------------------------------------------------------------------------------------------------------------------------------------------------|---------|----------------|
|        |       |        | GO:0006897 (endocytosis);<br>GO:0051668 (localization within membrane);<br>GO:0071363 (cellular response to growth factor stimulus)                                                                                                                                                                                                                                                                                                                                                                         |         |                |
| ERRFI1 | ERRFI | Q9UJM3 | GO:0045859 (regulation of protein kinase activity);<br>GO:1901699 (cellular response to nitrogen compound);<br>GO:1902532 (negative regulation of intracellular signal transduction);<br>GO:0042326 (negative regulation of phosphorylation);<br>GO:0071363 (cellular response to growth factor stimulus)                                                                                                                                                                                                   | 286-299 | RVPIPPRPVKPDYR |
| PTK2   | FAK1  | Q05397 | GO:0009896 (positive regulation of catabolic process);<br>GO:0120035 (regulation of plasma membrane bounded cell projection organization);<br>GO:1901699 (cellular response to nitrogen compound);<br>GO:0022604 (regulation of cell morphogenesis);<br>GO:0043551 (regulation of phosphatidylinositol 3-kinase activity);<br>GO:0008285 (negative regulation of cell population proliferation);<br>GO:0031175 (neuron projection development);<br>GO:0071363 (cellular response to growth factor stimulus) | 708-721 | SDEAPPKPSRPGYP |
| PTK2B  | FAK2  | Q14289 | GO:0051493 (regulation of cytoskeleton organization);<br>GO:0009896 (positive regulation of catabolic process);<br>GO:0045859 (regulation of protein kinase activity);<br>GO:0043551 (regulation of phosphatidylinositol 3-kinase activity);<br>GO:0031175 (neuron projection development)                                                                                                                                                                                                                  | 710-723 | FQEPPPKPSRPKYR |

|            |             |               |                                                                                                                                                                                                                                                         |                |                       |
|------------|-------------|---------------|---------------------------------------------------------------------------------------------------------------------------------------------------------------------------------------------------------------------------------------------------------|----------------|-----------------------|
| FBXO7      | FBX7        | Q9Y3I1        | GO:0009896 (positive regulation of catabolic process);<br>GO:0045859 (regulation of protein kinase activity);<br>GO:0120035 (regulation of plasma membrane bounded cell projection organization);<br>GO:0042326: negative regulation of phosphorylation | 502-515        | NDRFPFRPSRGRPT        |
| FGD5       | FGD5        | Q6ZNL6        | GO:0022604 (regulation of cell morphogenesis)                                                                                                                                                                                                           | 787-800        | IQIPRRPARAGAF         |
| FMN2       | FMN2        | Q9NZ56        | GO:0051640 (organelle localization)                                                                                                                                                                                                                     | 1285-1298      | QPIEPCRPMPKPLYW       |
| FOXA2      | FOXA2       | Q9Y261        | GO:0042326 (negative regulation of phosphorylation)                                                                                                                                                                                                     | 220-233        | VPRSPDKPGKGSFW        |
| <b>FYB</b> | <b>FYB1</b> | <b>O15117</b> | <b>GO:0051668 (localization within membrane);</b><br><b>GO:0050852 (T cell receptor signaling pathway)</b>                                                                                                                                              | <b>353-366</b> | <b>LGPPPPKPNRPPNV</b> |
| C1orf168   | FYB2        | Q5VWT5        | GO:0051668 (localization within membrane);<br>GO:0050852 (T cell receptor signaling pathway)                                                                                                                                                            | 275-288        | LGPPPPKPSRPPIV        |
| FZR1       | FZR1        | Q9UM11        | GO:0009896 (positive regulation of catabolic process)                                                                                                                                                                                                   | 160-173        | LLRSPRKPTRKISK        |
| GAL3ST3    | G3ST3       | Q96A11        |                                                                                                                                                                                                                                                         | 413-426        | LDNPPRPPIRVLPR        |
| GAB1       | GAB1        | Q13480        | GO:1901699 (cellular response to nitrogen compound);<br>GO:0071363 (cellular response to growth factor stimulus)                                                                                                                                        | 338-351        | PDIPPPRPPKPHPA        |
| GAB2       | GAB2        | Q9UQC2        | GO:0060627 (regulation of vesicle-mediated transport)                                                                                                                                                                                                   | 348-361        | AIAPPPRPPKPSQA        |
| GAB3       | GAB3        | Q8WWW8        |                                                                                                                                                                                                                                                         | 304-317        | SNTPPPRPPKPSHL        |
| GABRA1     | GBRA1       | P14867        | GO:0050808 (synapse organization)                                                                                                                                                                                                                       | 347-360        | KSVVPEKPKVKVDP        |
| GPR158     | GP158       | Q5T848        | GO:0051668 (localization within membrane)                                                                                                                                                                                                               | 963-976        | PAEEPRKPQKSGIM        |
| GPC2       | GPC2        | Q8N158        | GO:0120035 (regulation of plasma membrane bounded cell projection organization)                                                                                                                                                                         | 516-529        | AVAPPARPPRPYP         |

|         |       |        |                                                                                                                                                                                                                                                                                                                       |           |                 |
|---------|-------|--------|-----------------------------------------------------------------------------------------------------------------------------------------------------------------------------------------------------------------------------------------------------------------------------------------------------------------------|-----------|-----------------|
| HYPK    | HYPK  | Q9NX55 |                                                                                                                                                                                                                                                                                                                       | 18-31     | PERPPEKPRKHDSG  |
| ISLR2   | ISLR2 | Q6UXK2 | GO:0120035 (regulation of plasma membrane bounded cell projection organization)                                                                                                                                                                                                                                       | 617-630   | LAKHPGKPYRLILR  |
| ITCH    | ITCH  | Q96J02 | GO:0009896 (positive regulation of catabolic process);<br>GO:0008285 (negative regulation of cell population proliferation);<br>GO:1902532 (negative regulation of intracellular signal transduction)                                                                                                                 | 249-262   | KPSRPPRPSRPPPP  |
| KHDRBS1 | KHDR1 | Q07666 | GO:0050852 (T cell receptor signaling pathway)                                                                                                                                                                                                                                                                        | 423-436   | LKAPPARPVKGAYR  |
| KIF26B  | KI26B | Q2KJY2 | GO:0051640 (organelle localization)                                                                                                                                                                                                                                                                                   | 423-436   | LKAPPARPVKGAYR  |
| KIF1A   | KIF1A | Q12756 | GO:0120035 (regulation of plasma membrane bounded cell projection organization)                                                                                                                                                                                                                                       | 1853-1866 | KITPPRRPHRCSSG  |
| KIF23   | KIF23 | Q02241 |                                                                                                                                                                                                                                                                                                                       | 1091-1104 | DVLSPLRPSRRHFP  |
| KNDC1   | KNDC1 | Q76NI1 |                                                                                                                                                                                                                                                                                                                       | 824-837   | GPRHPPKPPRSKAT  |
| LARP1   | LARP1 | Q6PKG0 | GO:0009896 (positive regulation of catabolic process);<br>GO:1901699 (cellular response to nitrogen compound)                                                                                                                                                                                                         | 564-577   | PRPSPARPKKSEES  |
| LRFN1   | LRFN1 | Q9P244 |                                                                                                                                                                                                                                                                                                                       | 519-532   | GDPAPCRPLRAHFL  |
| LRFN4   | LRFN4 | Q6PJG9 | GO:0050808 (synapse organization)                                                                                                                                                                                                                                                                                     | 573-586   | PRSPPPRPQRSCSL  |
| LRP1    | LRP1  | Q07954 | GO:0051493 (regulation of cytoskeleton organization);<br>GO:0009896 (positive regulation of catabolic process);<br>GO:0060627 (regulation of vesicle-mediated transport);<br>GO:0006897 (endocytosis);<br>GO:1901699 (cellular response to nitrogen compound);<br>GO:0042326 (negative regulation of phosphorylation) | 3693-3706 | FVCPNRPFRCKND   |
| LRRC7   | LRRC7 | Q96NW7 |                                                                                                                                                                                                                                                                                                                       | 748-761   | PPGNIPQRPDRLPMS |

|        |       |        |                                                                                                                                                                                                                                   |                |                       |
|--------|-------|--------|-----------------------------------------------------------------------------------------------------------------------------------------------------------------------------------------------------------------------------------|----------------|-----------------------|
| LSM14A | LS14A | Q8ND56 |                                                                                                                                                                                                                                   | 395-408        | TFGIPLRPNRGRGGY       |
| MAP1A  | MAP1A | P78559 | GO:0051493 (regulation of cytoskeleton organization)                                                                                                                                                                              | 367-380        | SSEKPPEKPAKPERV       |
| MAP6   | MAP6  | Q96JE9 | GO:0051493 (regulation of cytoskeleton organization);<br>GO:0120035 (regulation of plasma membrane bounded cell projection organization);<br>GO:0051640 (organelle localization);<br>GO:0031175 (neuron projection development)   | 309-322        | TDIKPVKPIKAKPQ        |
| MICAL1 | MICA1 | Q8TDZ2 | <b>GO:0060627 (regulation of vesicle-mediated transport);</b><br><b>GO:0042326 (negative regulation of phosphorylation)</b>                                                                                                       | <b>826-839</b> | <b>EMEPPPKPPRSCSA</b> |
| MKRN2  | MKRN2 | Q9H000 | GO:0009896 (positive regulation of catabolic process);<br>GO:1902532 (negative regulation of intracellular signal transduction)                                                                                                   | 353-366        | RLAEPEKPRKQLSS        |
| SBF1   | MTMR5 | O95248 |                                                                                                                                                                                                                                   | 1031-1044      | SAHTPGRPPrVTKD        |
| MYO16  | MYO16 | Q9Y6X6 | GO:0008285 (negative regulation of cell population proliferation);<br>GO:0031175 (neuron projection development)                                                                                                                  | 1293-1306      | RKQPPKPKRDPNT         |
| MYO1C  | MYO1C | O00159 | GO:0051668 (localization within membrane);<br>GO:0071363 (cellular response to growth factor stimulus)                                                                                                                            | 15-28          | RVVHPHRPCKLALG        |
| MYO3A  | MYO3A | Q8NEV4 | GO:0051493 (regulation of cytoskeleton organization);<br>GO:0120035 (regulation of plasma membrane bounded cell projection organization);<br>GO:0120034 (positive regulation of plasma membrane bounded cell projection assembly) | 1489-1502      | ILRPPRRPRKPKTL        |
| MYO5A  | MYO5A | Q9Y4I1 | GO:1901699 (cellular response to nitrogen compound);                                                                                                                                                                              | 612-625        | LTRTPAKPTKGRPG        |



|        |       |        |                                                                                                                                                                                                                                                                        |           |                 |
|--------|-------|--------|------------------------------------------------------------------------------------------------------------------------------------------------------------------------------------------------------------------------------------------------------------------------|-----------|-----------------|
|        |       |        | GO:0051668 (localization within membrane);<br>GO:0051640 (organelle localization)                                                                                                                                                                                      |           |                 |
| NDST2  | NDST2 | P52849 |                                                                                                                                                                                                                                                                        | 67-80     | RPPVPPRPPRPET   |
| OSTF1  | OSTF1 | Q92882 |                                                                                                                                                                                                                                                                        | 1-14      | MSKPPPKPVKPGQV  |
| OTOF   | OTOF  | Q9HC10 |                                                                                                                                                                                                                                                                        | 1722-1735 | LDISPRKPKKYELR  |
| PIK3R3 | P55G  | Q92569 | GO:0051493 (regulation of cytoskeleton organization);<br>GO:0120035 (regulation of plasma membrane bounded cell projection organization);<br>GO:1901699 (cellular response to nitrogen compound);<br>GO:0043551 (regulation of phosphatidylinositol 3-kinase activity) | 34-47     | PPALPPKPPKPMTS  |
| PIK3R1 | P85A  | P27986 | GO:1901699 (cellular response to nitrogen compound);<br>GO:0043551 (regulation of phosphatidylinositol 3-kinase activity);<br>GO:0120034 (positive regulation of plasma membrane bounded cell projection assembly)                                                     | 304-319   | APALPPKPPKPTTV  |
| PCDH12 | PCD12 | Q9NPG4 |                                                                                                                                                                                                                                                                        | 759-772   | YRQQPKRPQKHIQK  |
| PDGFRA | PGFRA | P16234 | GO:0051493 (regulation of cytoskeleton organization);<br>GO:1901699 (cellular response to nitrogen compound);<br>GO:0043551 (regulation of phosphatidylinositol 3-kinase activity);<br>GO:0071363 (cellular response to growth factor stimulus)                        | 694-707   | LSHHPEKPKKELDI  |
| PRAM1  | PRAM  | Q96QH2 | GO:0060627 (regulation of vesicle-mediated transport);<br>GO:0051668 (localization within membrane);<br>GO:0050852 (T cell receptor signaling pathway)                                                                                                                 | 112-125   | VTDLPKKPSKLELSD |
| PJA1   | PJA1  | Q8NG27 |                                                                                                                                                                                                                                                                        | 226-239   | EQNLPARPSRAPVS  |

|          |       |        |                                                                                                                                                                                                                                                                                                                                                                                                                               |           |                |
|----------|-------|--------|-------------------------------------------------------------------------------------------------------------------------------------------------------------------------------------------------------------------------------------------------------------------------------------------------------------------------------------------------------------------------------------------------------------------------------|-----------|----------------|
| PSRC1    | PSRC1 | Q6PGN9 | GO:0051493 (regulation of cytoskeleton organization);<br>GO:0045859 (regulation of protein kinase activity);<br>GO:0051640 (organelle localization)                                                                                                                                                                                                                                                                           | 34-47     | VLVTPEKPLRRGLS |
| PTCH1    | PTC1  | Q13635 | GO:0051668 (localization within membrane);<br>GO:0008285 (negative regulation of cell population proliferation);<br>GO:0031175 (neuron projection development)                                                                                                                                                                                                                                                                | 1311-1324 | LWPPPYRPRRDAFE |
| PTPN1    | PTN1  | P18031 | GO:0009896 (positive regulation of catabolic process);<br>GO:0045859 (regulation of protein kinase activity);<br>GO:0060627 (regulation of vesicle-mediated transport);<br>GO:1901699 (cellular response to nitrogen compound);<br>GO:1902532 (negative regulation of intracellular signal transduction);<br>GO:0042326 (negative regulation of phosphorylation);<br>GO:0071363 (cellular response to growth factor stimulus) | 305-318   | HIPPPPRPPKRILE |
| PTPN12   | PTN12 | Q05209 |                                                                                                                                                                                                                                                                                                                                                                                                                               | 330-353   | KQDSPPPKPPRTRS |
| CAD      | PYR1  | P27708 |                                                                                                                                                                                                                                                                                                                                                                                                                               | 1830-1843 | MTTTPERPRRGIPG |
| REPS1    | REPS1 | Q96D71 | GO:0006897 (endocytosis)                                                                                                                                                                                                                                                                                                                                                                                                      | 695-708   | PLAPPPKPVRRRLK |
| RGS5     | RGS5  | O15539 | GO:1901699 (cellular response to nitrogen compound)                                                                                                                                                                                                                                                                                                                                                                           | 40-53     | YNEKPEKPAKTQKT |
| RGS8     | RGS8  | P57771 | GO:1901699 (cellular response to nitrogen compound)                                                                                                                                                                                                                                                                                                                                                                           | 31-44     | TAILPDKPNRALKR |
| ARHGAP32 | RHG32 | A7KAX9 |                                                                                                                                                                                                                                                                                                                                                                                                                               | 1976-1989 | SIVPPPKPERSHSL |
| BZRAP1   | RIMB1 | O95153 | GO:0022604 (regulation of cell morphogenesis)                                                                                                                                                                                                                                                                                                                                                                                 | 1729-1742 | TTGPPPKPRRSKKA |
| RIMS2    | RIMS2 | Q9UQ26 | GO:0060627 (regulation of vesicle-mediated transport)                                                                                                                                                                                                                                                                                                                                                                         | 522-535   | VRPPPPKPHKSKKG |

|                |              |               |                                                                                                                            |                |                       |
|----------------|--------------|---------------|----------------------------------------------------------------------------------------------------------------------------|----------------|-----------------------|
| RIOK3          | RIOK3        | O14730        | GO:1901699 (cellular response to nitrogen compound); GO:1902532 (negative regulation of intracellular signal transduction) | 137-150        | TRDDPYRPAKPVPT        |
| RNF25          | RNF25        | Q96BH1        |                                                                                                                            | 335-348        | AMLDPKPSRGPWR         |
| RYBP           | RYBP         | Q8N488        |                                                                                                                            | 5-18           | DKKSPTRPKRQAKP        |
| SASH1          | SASH1        | O94885        | GO:0045859 (regulation of protein kinase activity)                                                                         | 616-629        | DEEKPKRPTRRRRK        |
| C11orf31       | SELH         | Q8IZQ5        |                                                                                                                            | 67-80          | VKVNPTKPRRGSFE        |
| SH3D19         | MTMR5        | Q5HYK7        | GO:0009896 (positive regulation of catabolic process); GO:0022604 (regulation of cell morphogenesis)                       | 258-271        | VIRIPAKPGKCLHE        |
| <b>SH3KBP1</b> | <b>SH3K1</b> | <b>Q96B97</b> | <b>GO:0006897 (endocytosis); GO:0022604 (regulation of cell morphogenesis)</b>                                             | <b>415-429</b> | <b>GALPPRRPERPVGP</b> |
| SHANK2         | SHAN2        | Q9UPX8        | GO:0050808 (synapse organization); GO:1902532 (negative regulation of intracellular signal transduction)                   | 999-1012       | AVYVPAKPARRKGM        |
| SHANK3         | SHAN3        | Q9BYB0        |                                                                                                                            | 911-924        | AATPPERPKRRPRP        |
| INPP5D         | SHIP1        | Q92835        | GO:0050852 (T cell receptor signaling pathway); GO:0008285 (negative regulation of cell population proliferation)          | 1117-1130      | PAKRPIKPSRSEIN        |
| SHISA6         | SHSA6        | Q6ZSJ9        | GO:0051668 (localization within membrane); GO:0098962 (regulation of postsynaptic neurotransmitter receptor activity)      | 1327-1340      | KAPRPAKPHKPPGS        |
| SMG8           | SMG8         | Q8ND04        | GO:0045859 (regulation of protein kinase activity)                                                                         | 284-297        | DPAHPDKPKKHSPK        |
| C9orf24        | SMRP1        | Q8NCR6        |                                                                                                                            | 144-157        | PLECPPRPERLNAY        |
| SPERT          | SPERT        | Q8NA61        |                                                                                                                            | 434-444        | RSQDPKKPSRV           |
| SYNJ1          | SYNJ1        | O43426        | GO:0060627 (regulation of vesicle-mediated transport); GO:0006897 (endocytosis); GO:0051640 (organelle localization)       | 1061-1074      | VPSPPIRPSRAPSR        |

|          |       |        |                                                                                                                                |           |                |
|----------|-------|--------|--------------------------------------------------------------------------------------------------------------------------------|-----------|----------------|
| TANC2    | TANC2 | Q9HCD6 | GO:0120035 (regulation of plasma membrane bounded cell projection organization);<br>GO:0051640 (organelle localization)        | 1975-1988 | GQTSPKPKRPFVE  |
| TNKS1BP1 | TB182 | Q9C0C2 | GO:0009896 (positive regulation of catabolic process)                                                                          | 1698-1711 | PLTLPPKPEKSSGS |
| TDRD3    | TDRD3 | Q9H7E2 |                                                                                                                                | 529-542   | RRSGPIKPEKILES |
| THEMIS   | THMS1 | Q8N1K5 | GO:0050852 (T cell receptor signaling pathway)                                                                                 | 550-563   | ASHPPRPPKHPSV  |
| THSD7A   | THS7A | Q9UPZ6 |                                                                                                                                | 1629-1642 | ACKPKKPQRRQNN  |
| TULP1    | TULP1 | O00294 | GO:0060627 (regulation of vesicle-mediated transport); GO:0006897 (endocytosis);<br>GO:0031175 (neuron projection development) | 171-184   | SPDPPPKPLVRNK  |
| ZCCHC6   | TUT7  | Q5VYS8 | GO:0009896 (positive regulation of catabolic process)                                                                          | 178-191   | QRSRPRKPRKTRNE |
| KIAA1429 | VIR   | Q69YN4 |                                                                                                                                | 1670-1683 | GIPPPKRPLKVSQK |
| WDR44    | WDR44 | Q5JSH3 |                                                                                                                                | 207-220   | EEVAPAKPPRHLTP |
| WDR7     | WDR7  | Q9Y4E6 |                                                                                                                                | 914-927   | MKKGPTRPPRPSTP |
| ZNF746   | ZN746 | Q6NUN9 |                                                                                                                                | 344-357   | GLREPARPERDMGE |
| ZSWIM8   | ZSWM8 | A7E2V4 | GO:0009896 (positive regulation of catabolic process)                                                                          | 1127-1140 | GWGSPGRPKKKHTG |

The previously-reported targets recognized by ASAP/GRAF/SKAP proteins are listed in bold.
